# Supplementary material
Source: Frontiers journal article supplement (https://www.frontiersin.org/articles/129358)
Supplement: Presentation_1.PDF [file Presentation_1.PDF]

## ***Supplementary Material***

### ***Trichoderma reesei* FS10-C enhances phytoremediation by *Sedum plumbizincicola* for Cd-contaminated soils and associated soil microbial activities**

**Teng Ying<sup>a\*</sup>, Luo Yang<sup>a</sup>, Ma Wenting<sup>a</sup>, Zhu Lingjia<sup>a</sup>, Ren Wenjie<sup>a</sup>, Luo Yongming<sup>a,b</sup>, Li Zhengao<sup>a</sup>**

a Key Laboratory of Soil Environment and Pollution Remediation, Institute of Soil Science, Chinese Academy of Sciences, Nanjing 210008, China

b Yantai Institute of Coastal Zone Research, Chinese Academy of Sciences, Yantai 264003, China

#### **\*Correspondence:**

Ying Teng, yteng@issas.ac.cn

Key Laboratory of Soil Environment and Pollution Remediation Institute of Soil Science, Chinese Academy of Sciences, East Beijing Road No. 71, Nanjing, Jiangsu Province, 210008, China

#### **This file includes:**

Supplementary Figures S1 and S2

## Supplementary Figures

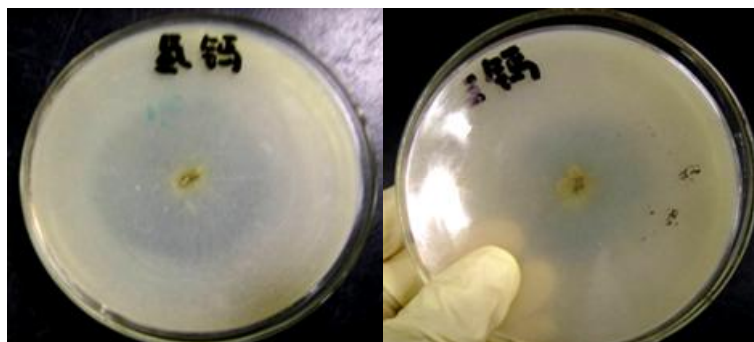

(a) The plate with  $\text{CaHPO}_4$

(b) The plate with  $\text{Ca}_3(\text{PO}_4)_2$

Fig. S1 Inorganic phosphate solubilization ability of *T. reesei* FS10-C. The circles of dissolved P were  $54.2 \pm 0.3$  mm (a) and  $45.2 \pm 0.2$  mm (b).

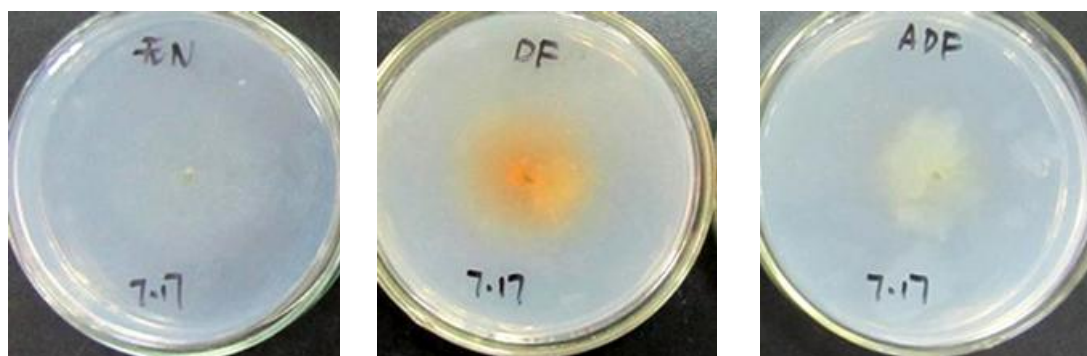

(a) Nitrogen free medium

(b) DF medium

(c) ADF medium

Fig. S2 ACC deaminase production ability of *T. reesei* FS10-C. The DF medium (pH 7.5) was composed of  $4.0 \text{ g L}^{-1} \text{ KH}_2\text{PO}_4$ ,  $6.0 \text{ g L}^{-1} \text{ Na}_2\text{HPO}_4$ ,  $0.2 \text{ g L}^{-1} \text{ MgSO}_4 \cdot 7\text{H}_2\text{O}$ ,  $2.0 \text{ g L}^{-1} \text{ glucose}$ ,  $2.0 \text{ g L}^{-1} \text{ gluconic acid}$ ,  $2.0 \text{ g L}^{-1} \text{ citric acid}$ ,  $2.0 \text{ g L}^{-1} (\text{NH}_4)_2\text{SO}_4$ ,  $0.1 \text{ mL FeSO}_4 \cdot 7\text{H}_2\text{O}$ ,  $0.1 \text{ mL microelement solution}$  and  $18 \text{ g L}^{-1} \text{ agar}$ . The ADF medium was prepared using  $3.0 \text{ mmol L}^{-1} \text{ ACC}$  to replace  $2.0 \text{ g L}^{-1} (\text{NH}_4)_2\text{SO}_4$ . The DF medium without the addition of  $(\text{NH}_4)_2\text{SO}_4$  was used as the nitrogen free medium.
